# Supplementary material for: A near-infrared “on–off” fluorescent and colourimetric cyanide chemodosimeter based on phenothiazine with applications in living cell imaging
Source: Royal Society of Chemistry journal article supplement (doi:10.1039/c4ra11567h), 2014-10-29
Supplement: c4ra11567h1.pdf [file c4ra11567h1.pdf]

## Electronic Supplementary Information (ESI)

# **A near-infrared “on-off” fluorescent and colorimetric cyanide chemodosimeter based on phenothiazine with applications in living cell imaging**

Qi Zou,<sup>\*a‡</sup> Xin Li,<sup>b‡</sup> Qunjie Xu,<sup>a</sup> Hans Ågren,<sup>b</sup> Wandong Zhao<sup>a</sup> and Yi Qu<sup>\*c</sup>

<sup>a</sup> Shanghai Key Laboratory of Materials Protection and Advanced Materials in Electric Power, Shanghai University of Electric Power, Shanghai 200090, P. R. China

<sup>b</sup> Division of Theoretical Chemistry and Biology, School of Biotechnology, KTH Royal Institute of Technology, SE-10691 Stockholm, Sweden

<sup>c</sup> College of Chemistry and Chemical Engineering, Shanghai University of Engineering Science, Shanghai 201620, P. R. China

‡ These authors contributed equally.

\*Corresponding author: E-mail: qzou@shiep.edu.cn (Q. Zou); Tel. / Fax: +86-21-35303544.

E-mail: yiqu@sues.edu.cn (Y. Qu); Tel. / Fax: +86-21-67791214.

## Supplementary figures and tables

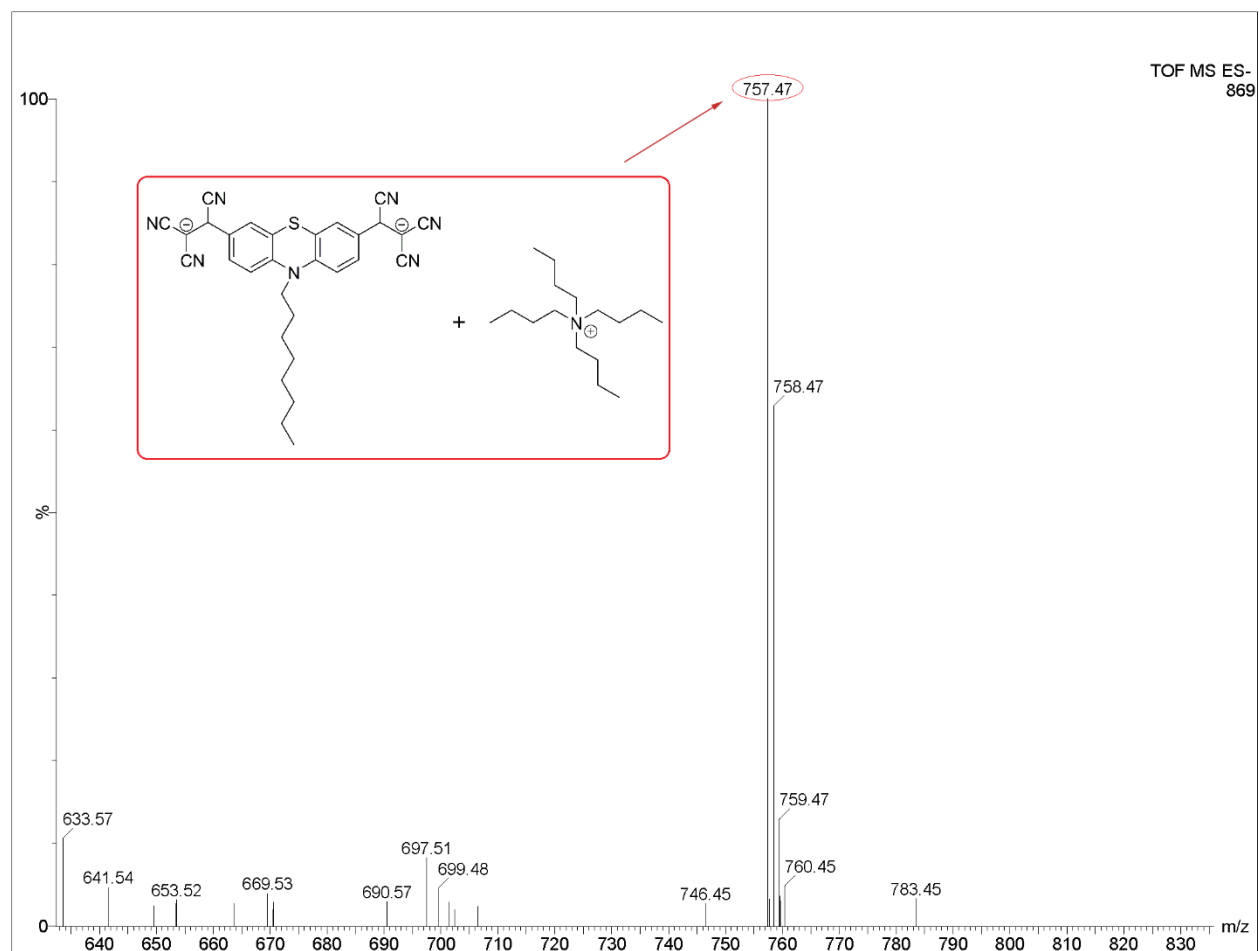

**Fig. S1** MS (ESI-) spectrum of compound **PTZ** (10  $\mu\text{M}$ ) with  $\text{CN}^-$  (22  $\mu\text{M}$ ) in  $\text{CH}_3\text{CN}$  solution at 25  $^\circ\text{C}$ .

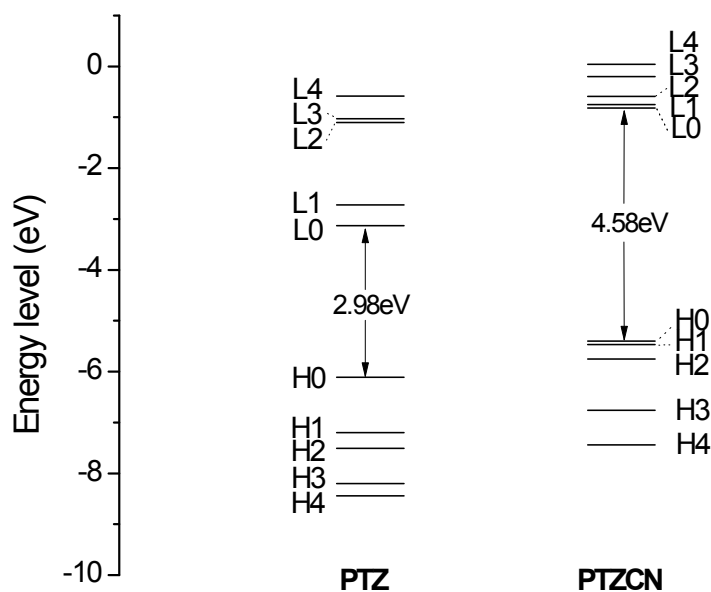

**Fig. S2** Energy levels of the frontier molecular orbitals of compound **PTZ** and its adduct with  $\text{CN}^-$ . H0 = HOMO, L0 = LUMO, H1 = HOMO-1, L1 = LUMO+1, etc.

**Table S1** Excitation energies, oscillator strengths and molecular orbital compositions of low-lying excited states of compound **PTZ**, computed at the TD-PBE0/6-311+G(2d,p) level of theory.

| Compound             | State | $\lambda_{\text{abs}}$ | $f$    | MO composition              | Charge transfer |
|----------------------|-------|------------------------|--------|-----------------------------|-----------------|
| <b>PTZ</b> ( $S_0$ ) | $S_1$ | 2.31 eV, 537 nm        | 0.6112 | H-0 $\rightarrow$ L+0 (98%) | 0.217 $e$       |
|                      | $S_2$ | 2.86 eV, 433 nm        | 0.0572 | H-0 $\rightarrow$ L+1 (96%) | 0.242 $e$       |

|                              |                |                    |        |                 |                |
|------------------------------|----------------|--------------------|--------|-----------------|----------------|
|                              | S <sub>3</sub> | 3.36 eV, 369<br>nm | 0.7768 | H-1 → L+0 (95%) | 0.204 <i>e</i> |
|                              | S <sub>6</sub> | 4.04 eV, 307<br>nm | 0.8348 | H-0 → L+3 (80%) | ---            |
| <b>PTZ</b> (S <sub>1</sub> ) | S <sub>1</sub> | 1.78 eV, 695<br>nm | 0.4576 | H-0 → L+0 (98%) | 0.227 <i>e</i> |

---

**Table S2** Excitation energies, oscillator strengths and molecular orbital compositions of low-lying excited states of compound **PTZ**, computed at the TD-CAM-B3LYP/6-311+G(2d,p) level of theory.

| Compound   | State          | $\lambda_{\text{abs}}$ | $f$    | MO composition  | Charge transfer |
|------------|----------------|------------------------|--------|-----------------|-----------------|
| <b>PTZ</b> | S <sub>1</sub> | 2.75 eV, 451<br>nm     | 0.9098 | H-0 → L+0 (92%) | 0.238 <i>e</i>  |
|            | S <sub>2</sub> | 3.45 eV, 359<br>nm     | 0.1248 | H-0 → L+1 (90%) | 0.291 <i>e</i>  |
|            | S <sub>3</sub> | 3.83 eV, 323<br>nm     | 0.7763 | H-1 → L+0 (80%) | 0.159 <i>e</i>  |
|            | S <sub>5</sub> | 4.32 eV, 287<br>nm     | 0.7747 | H-0 → L+3 (67%) | ---             |

---

**Table S3** Excitation energies, oscillator strengths and molecular orbital compositions of low-lying excited states of compound **PTZCN**, computed at the TD-PBE0/6-311+G(2d,p) level of theory.

| Compound                                                                            | State           | $\lambda_{\text{abs}}$                                                              | $f$                                                                                   | MO composition  |
|-------------------------------------------------------------------------------------|-----------------|-------------------------------------------------------------------------------------|---------------------------------------------------------------------------------------|-----------------|
| PTZCN                                                                               | S <sub>1</sub>  | 3.68 eV, 336 nm                                                                     | 0.0698                                                                                | H-0 → L+0 (64%) |
|                                                                                     |                 |                                                                                     |                                                                                       | H-2 → L+0 (21%) |
|                                                                                     | S <sub>4</sub>  | 3.86 eV, 321 nm                                                                     | 0.0322                                                                                | H-0 → L+1 (73%) |
|                                                                                     |                 |                                                                                     |                                                                                       | H-1 → L+2 (13%) |
|                                                                                     |                 |                                                                                     |                                                                                       | H-0 → L+5 (17%) |
|                                                                                     | S <sub>9</sub>  | 4.12 eV, 300 nm                                                                     | 0.0733                                                                                | H-0 → L+0 (23%) |
|                                                                                     |                 |                                                                                     |                                                                                       | H-2 → L+0 (20%) |
|                                                                                     |                 |                                                                                     |                                                                                       | H-0 → L+5 (17%) |
|                                                                                     |                 |                                                                                     |                                                                                       | H-1 → L+4 (12%) |
| S <sub>9</sub>                                                                      | 4.14 eV, 299 nm | 0.2515                                                                              | H-2 → L+2 (51%)                                                                       |                 |
|                                                                                     |                 |                                                                                     | H-1 → L+1 (24%)                                                                       |                 |
|                                                                                     |                 |                                                                                     | H-0 → L+2 (18%)                                                                       |                 |
| HOMO-1                                                                              |                 | HOMO                                                                                |                                                                                       |                 |
| 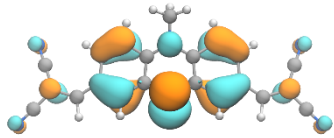 |                 |  |                                                                                       |                 |
| LUMO                                                                                |                 | LUMO+1                                                                              | LUMO+3                                                                                |                 |
|  |                 |  |  |                 |

**Fig. S3** Contour plots of frontier molecular orbitals of compound **PTZ**.

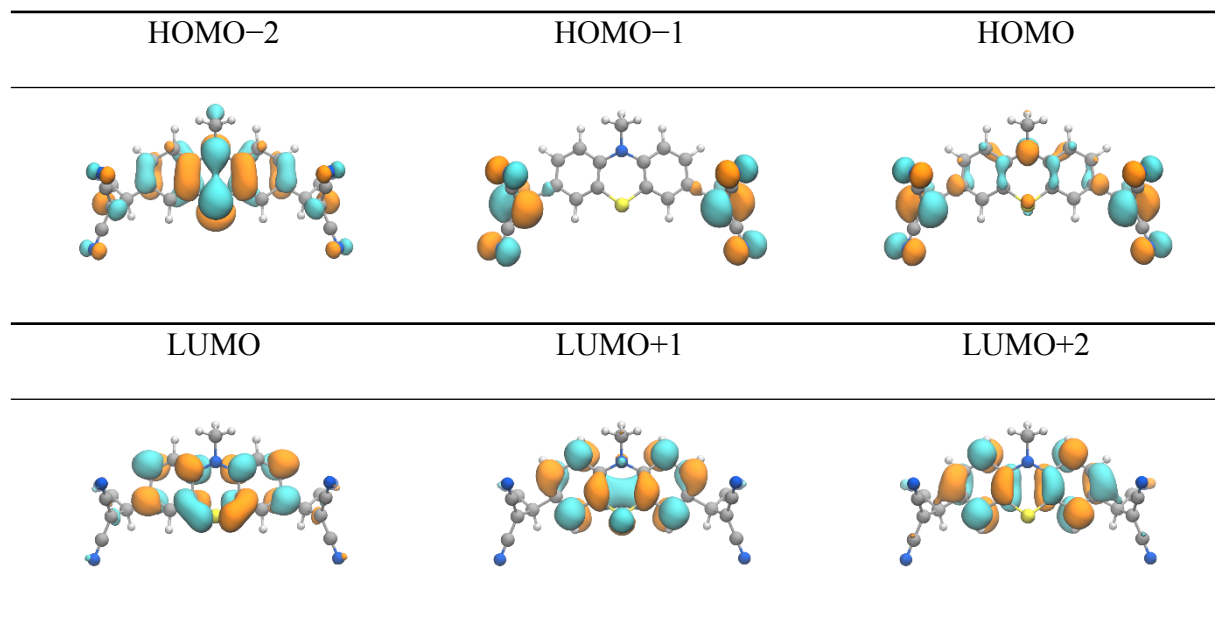

**Fig. S4** Contour plots of frontier molecular orbitals of compound **PTZCN**.

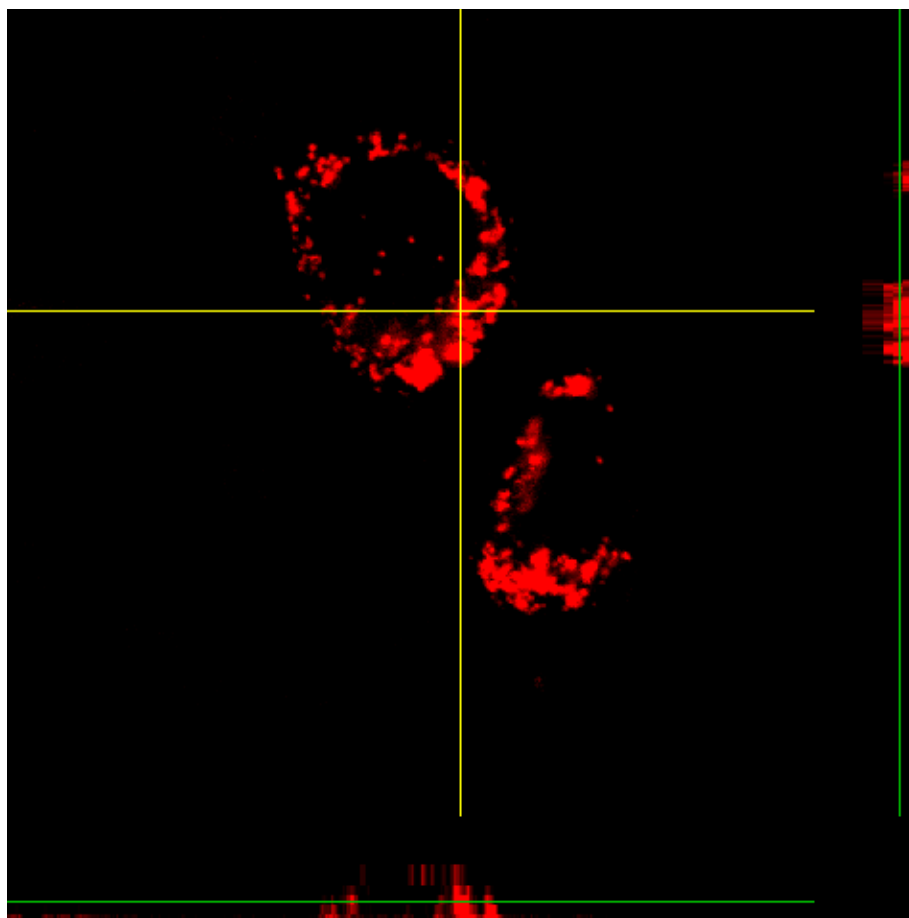

**Fig. S5** Z-scan images of HeLa cells supplemented with 20  $\mu\text{M}$   $\text{CN}^-$  in the growth media for 20 min at 37  $^\circ\text{C}$  and then incubated with compound **PTZ** (10  $\mu\text{M}$ ) for 30 min at 37  $^\circ\text{C}$ .  $\lambda_{\text{ex}} = 488$  nm. Collecting region: 650–750 nm.

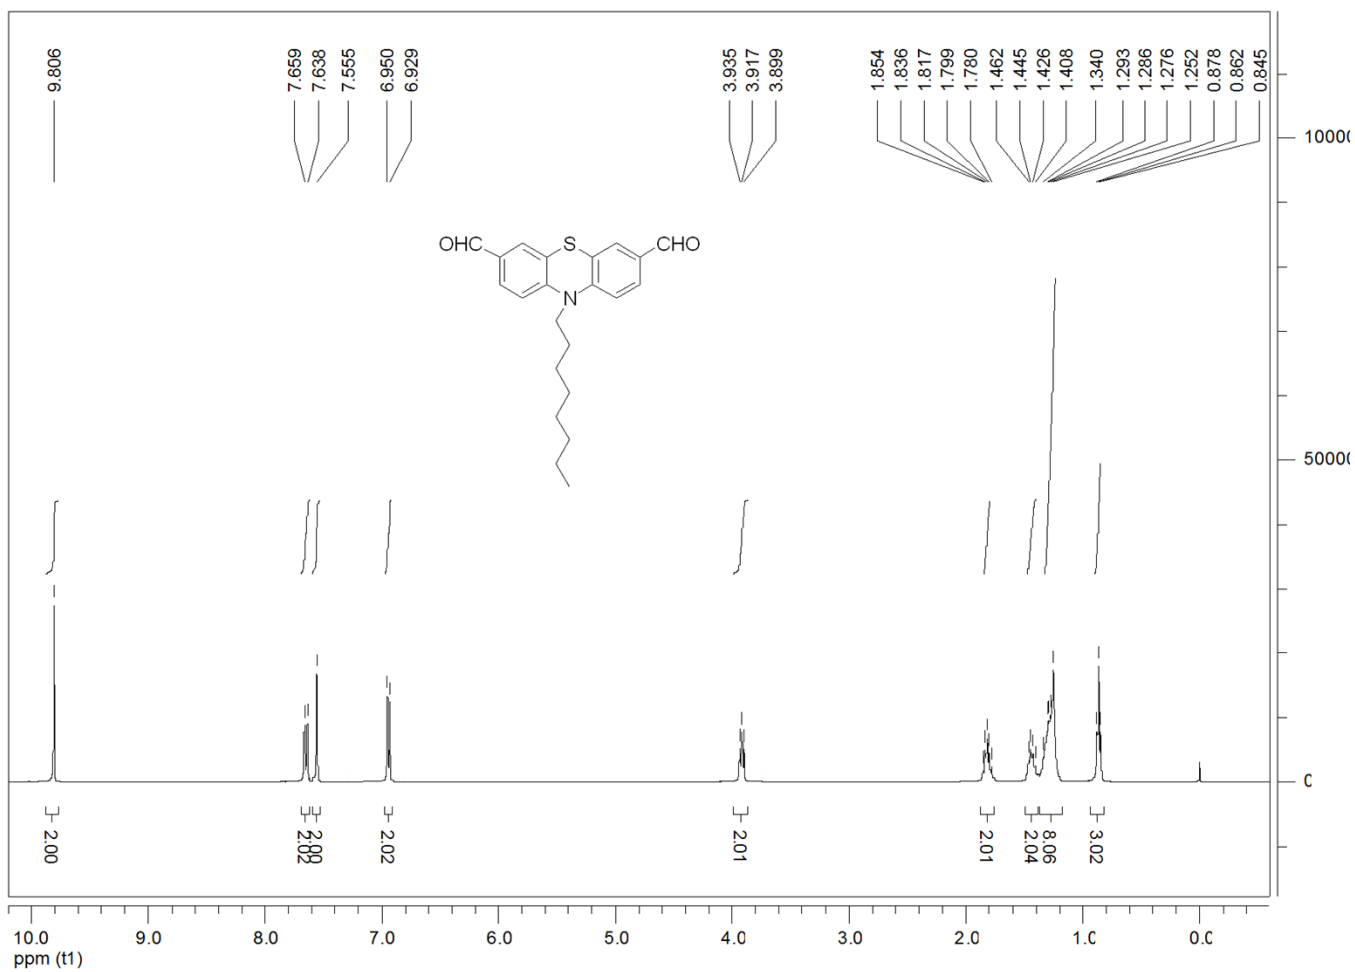

**Fig. S6**  $^1\text{H}$  NMR ( $\text{CDCl}_3$ , 400 MHz) spectrum of compound **2**.



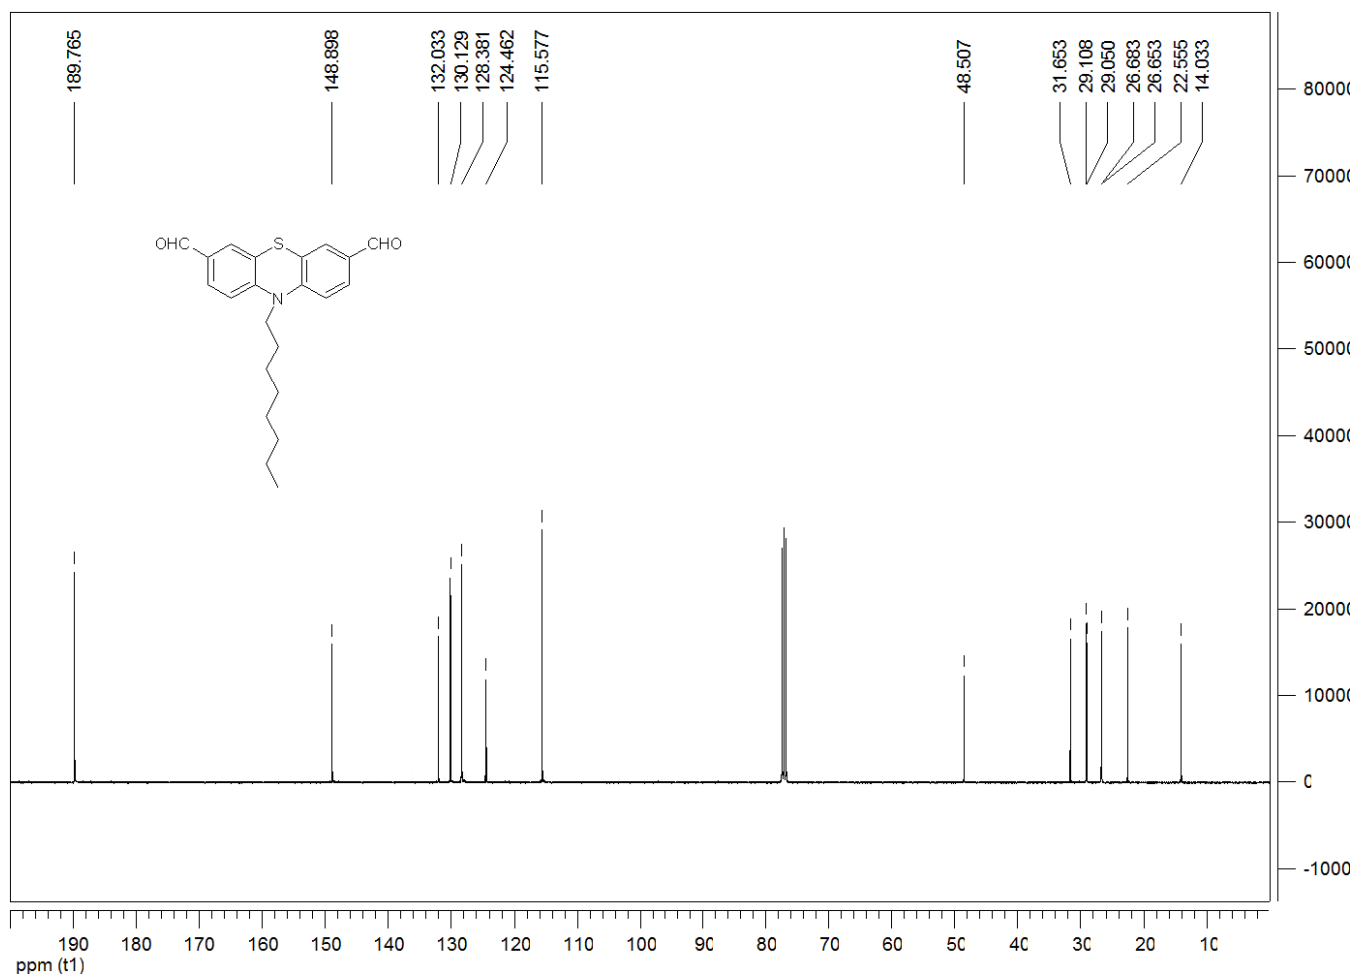

**Fig. S7**  $^{13}\text{C}$  NMR ( $\text{CDCl}_3$ , 100 MHz) spectrum of compound 2.

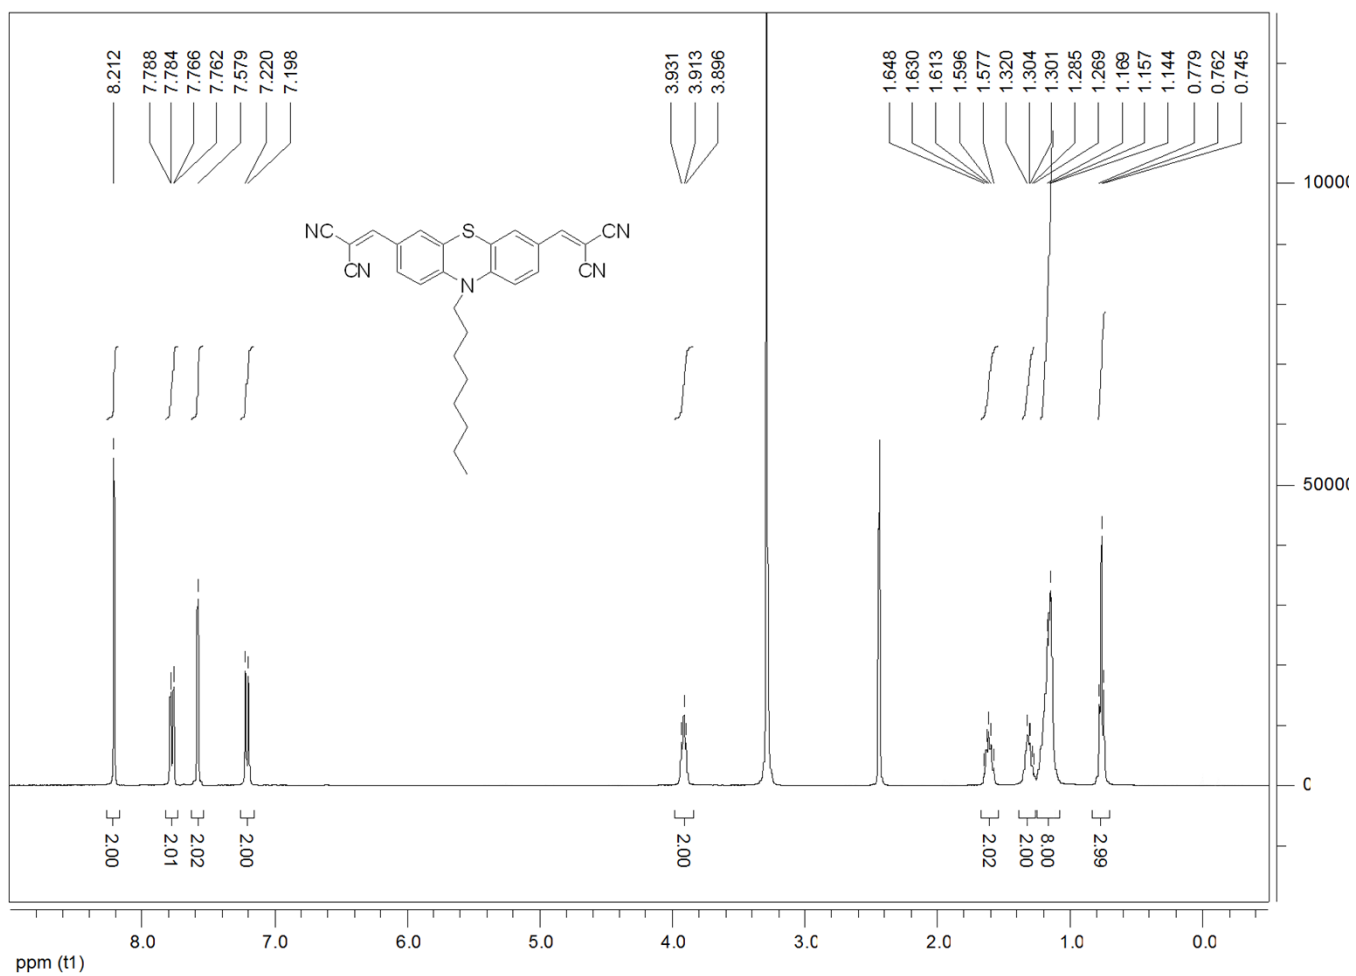

**Fig. S8** <sup>1</sup>H NMR (DMSO-*d*<sub>6</sub>, 400 MHz) spectrum of compound **PTZ**.

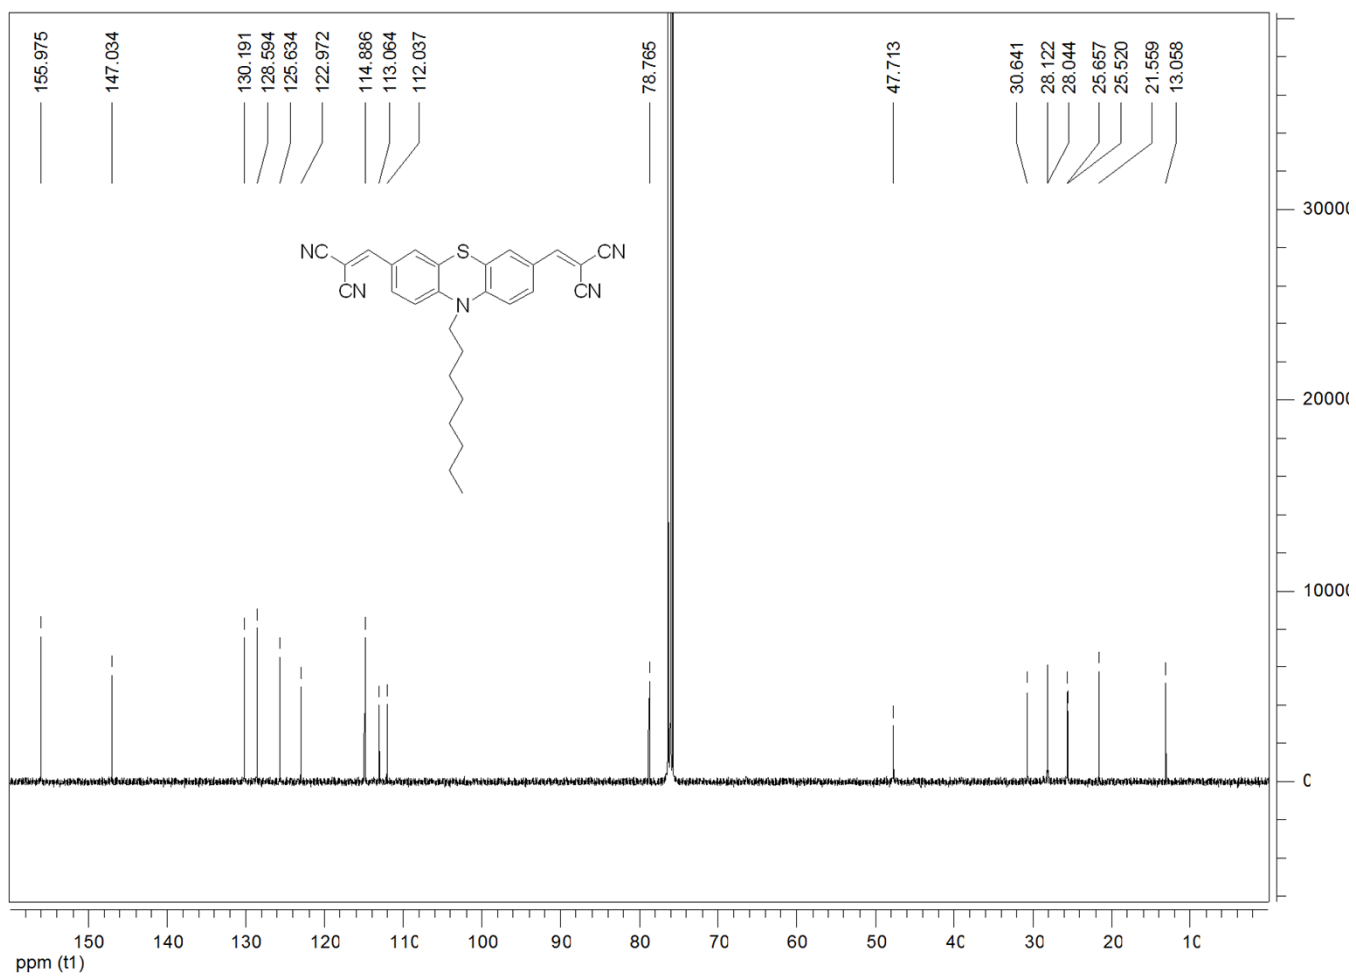

**Fig. S9**  $^{13}\text{C}$  NMR ( $\text{CDCl}_3$ , 100 MHz) spectrum of compound **PTZ**.

**Multiple Mass Analysis: 29 mass(es) processed**

Tolerance = 5.0 mDa / DBE: min = -1.5, max = 50.0

Element prediction: Off

Monoisotopic Mass, Odd and Even Electron Ions

558 formula(e) evaluated with 32 results within limits (all results (up to 1000) for each mass)

Elements Used:

C: 0-28 H: 0-25 N: 0-5 S: 0-1

Waters GCT Premier

20141865 568 (9.471) Cm (568-(125+172))

TOF MS EI+  
1.34e+004  
463.1832

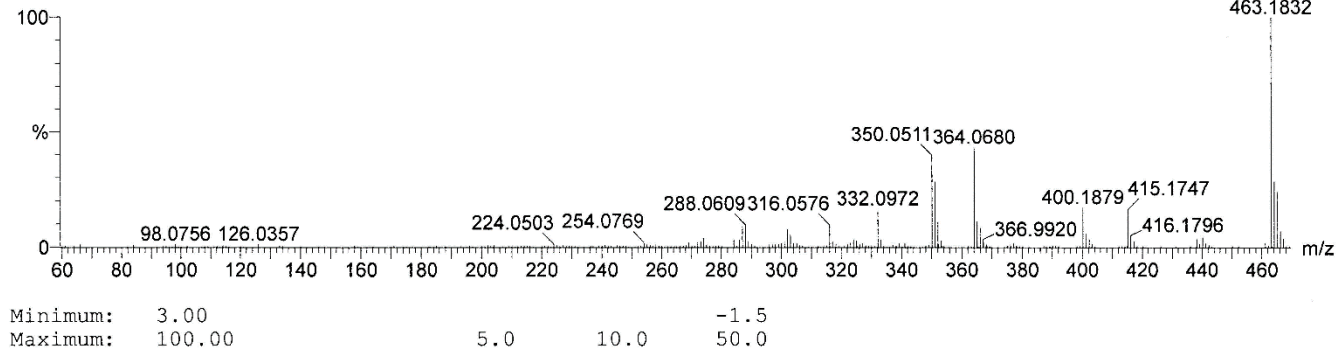

**Fig. S10** HRMS (EI+) spectrum of compound **PTZ**.
